# Supplementary material for: How, When, and Where Relic DNA Affects Microbial Diversity
Source: PubMed Central journal article supplement (PMC6016248; doi:10.1128/mbio.00637-18), 2018-06-19

**Fig. S2.** Flow diagram depicting how a sample was processed to quantify the proportion of relic DNA.

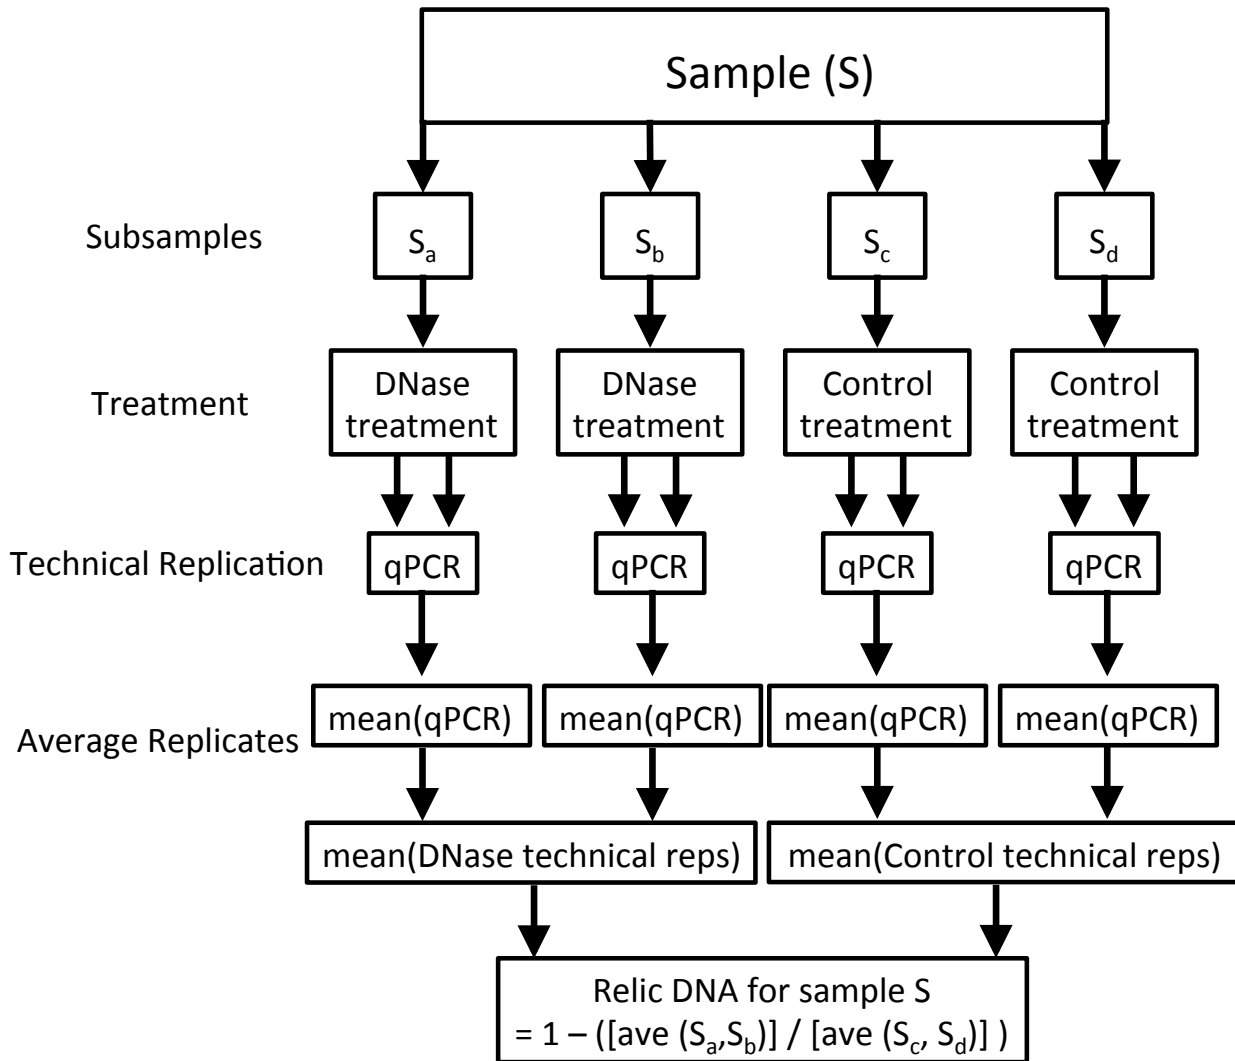

Supplement: mbo003183932sf2.pdf [file mbo003183932sf2.pdf]
