# Supplementary material for: How, When, and Where Relic DNA Affects Microbial Diversity
Source: PubMed Central journal article supplement (PMC6016248; doi:10.1128/mbio.00637-18), 2018-06-19

**Fig. S5.** Principal Coordinates Analysis (PCoA) on  $\log_{10}$ -transformed relative abundances using **a** Bray-Curtis and **b** UniFrac distance metrics to test for the effects of relic DNA removal on community composition. "DNase" symbols refer to samples where relic DNA was removed by DNase treatment (a.k.a., intact DNA); "Control" symbols refer to samples that were not treated with DNase and thus contain intact + relic DNA (a.k.a., total DNA).

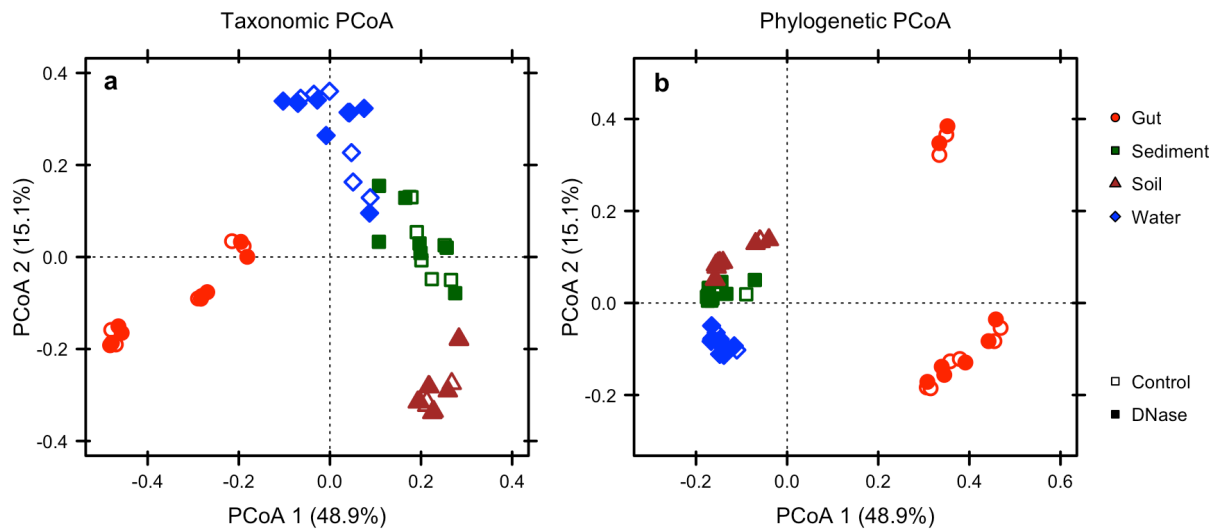

Supplement: mbo003183932sf5.pdf [file mbo003183932sf5.pdf]
