# Supplementary material for: How, When, and Where Relic DNA Affects Microbial Diversity
Source: PubMed Central journal article supplement (PMC6016248; doi:10.1128/mbio.00637-18), 2018-06-19
Supplement: mbo003183932st1.pdf [file mbo003183932st1.pdf]

**Table S1.** Proportion of relic DNA in samples from different ecosystem types. The mean coefficient of variation (standard deviation / mean) for the 16S rRNA qPCR assay applied to independent samples within a site was 0.24.

| Sample # | Sample Name  | Ecosystem type | Relic DNA |
|----------|--------------|----------------|-----------|
| 23       | Feces1       | gut            | 0.329     |
| 24       | Feces2       | gut            | 0.467     |
| 30       | FecesDog     | gut            | 0.401     |
| 31       | FecesCow1    | gut            | 0.617     |
| 32       | FecesCat     | gut            | 0.000     |
| 33       | FecesCow2    | gut            | 0.199     |
| 34       | FecesHorse   | gut            | 0.684     |
| 35       | FecesRabbit  | gut            | 0.170     |
| 2        | KelloggDrain | sediment       | 0.503     |
| 7        | Gull         | sediment       | 0.648     |
| 9        | Wintergreen  | sediment       | 0.285     |
| 11       | Austin       | sediment       | 0.399     |
| 13       | Woods        | sediment       | 0.547     |
| 15       | Crooked      | sediment       | 0.062     |
| 16       | Sherman      | sediment       | 0.031     |
| 18       | Duck         | sediment       | 0.000     |
| 5        | DF           | soil           | 0.276     |
| 21       | Kzoo         | soil           | 0.167     |
| 22       | Holland      | soil           | 0.162     |
| 25       | T7           | soil           | 0.000     |
| 26       | Entisol      | soil           | 0.196     |
| 27       | Spodosol1    | soil           | 0.223     |
| 27       | Spodosol2    | soil           | 0.000     |
| 29       | Histosol     | soil           | 0.379     |
| 1        | Gull         | water          | 0.362     |
| 3        | Augusta      | water          | 0.578     |
| 4        | KelloggDrain | water          | 0.363     |
| 8        | Wintergreen  | water          | 0.340     |
| 10       | Austin       | water          | 0.325     |
| 12       | Woods        | water          | 0.195     |
| 14       | Crooked      | water          | 0.454     |
| 17       | Duck         | water          | 0.290     |
| 19       | Sherman      | water          | 0.590     |
| 20       | Sherman      | water          | 0.830     |
