# Supplementary material for: How, When, and Where Relic DNA Affects Microbial Diversity
Source: PubMed Central journal article supplement (PMC6016248; doi:10.1128/mbio.00637-18), 2018-06-19
Supplement: mbo003183932st2.pdf [file mbo003183932st2.pdf]

**Table S2.** Estimates of diversity within samples from different ecosystem types. Richness was calculated as the number of operational taxonomic units (97% sequence similarity of the 16S rRNA gene), evenness was calculated using Simpson's evenness index, and phylogenetic diversity was calculated using Faith's *D* index. The intact DNA samples were treated with DNase to remove relic DNA. The total samples were not treated with DNase and thus contained intact and relic DNA. Values are means and standard error of the means (in parentheses).

| Ecosystem | Richness        |                 | Evenness          |                   | Faith's <i>D</i> |               |
|-----------|-----------------|-----------------|-------------------|-------------------|------------------|---------------|
|           | Intact          | Total           | Intact            | Total             | Intact           | Total         |
| Gut       | 1435<br>(402.7) | 1474<br>(463.2) | 0.379<br>(0.0172) | 0.375<br>(0.1481) | 167<br>(41.8)    | 168<br>(44.2) |
| Soil      | 2950<br>(387.6) | 3084<br>(397.8) | 0.240<br>(0.0568) | 0.240<br>(0.0587) | 398<br>(46.1)    | 415<br>(48.6) |
| Lake      | 1362<br>(359.8) | 1344<br>(235.6) | 0.151<br>(0.0280) | 0.147<br>(0.0268) | 295<br>(58.0)    | 297<br>(39.1) |
| Sediments | 3875<br>(517.0) | 4432<br>(345.6) | 0.199<br>(0.0251) | 0.187<br>(0.0227) | 581<br>(57.5)    | 657<br>(33.7) |
